# Supplementary material for: Study on the definition, mechanism and controllability of secondary bubbles based on the bubble nucleation model in injection foaming polypropylene
Source: Royal Society of Chemistry journal article supplement (doi:10.1039/d2ra06702a), 2023-01-01
Supplement: d2ra06702a1.pdf [file d2ra06702a1.pdf]

## Supplementary Information

### **Study on the definition, mechanism and controllability of secondary bubbles based on the bubble nucleation model in injection foaming polypropylene**

Jinfu Xing <sup>a</sup>, Bujin Liu <sup>a</sup>, Tuanhui Jiang <sup>a, b</sup>, Yujing You <sup>a</sup>, Xiangbu Zeng <sup>a, b</sup>, Jinkui Yang <sup>a, b</sup>, Chun Zhang <sup>b</sup>, Wei Gong <sup>a, c \*</sup>, Li He <sup>a, b \*</sup>

<sup>a</sup> College of Materials and Metallurgy, Guizhou University, Guiyang 550025, China

<sup>b</sup> National Engineering Research Center for Compounding and Modification of Polymeric Materials, Guiyang 550014, China

<sup>c</sup> School of Materials and Architectural Engineering, Guizhou Normal University, Guiyang 550025, China

Correspondence to: L. He (E-mail: [liwe@gzu.edu.cn](mailto:liwe@gzu.edu.cn)) and W. Gong (E-mail: [gw20030501@163.com](mailto:gw20030501@163.com))

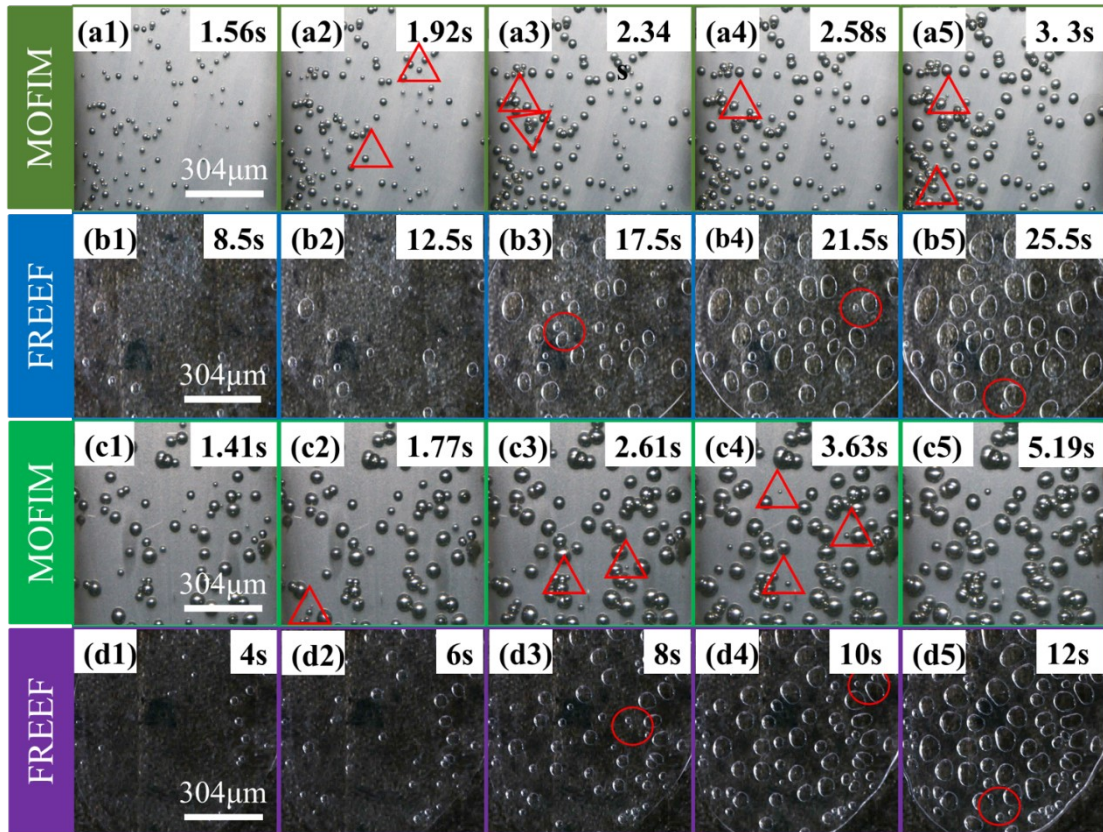

Fig.S1. Visual observation images of secondary bubbles at different melt temperature: (a) MOFIM+200°C, (b) FREEF+200°C, (c) MOFIM+220°C, (d) FREEF+220°C.

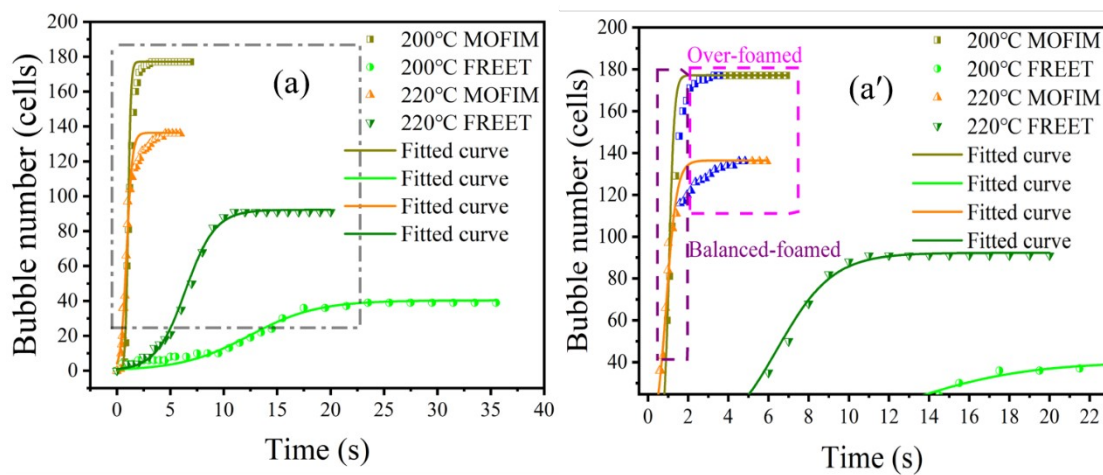

Fig.S2. (a and a') Fitting curve of experimental and fitted values under 200°C and 220°C melt temperature.

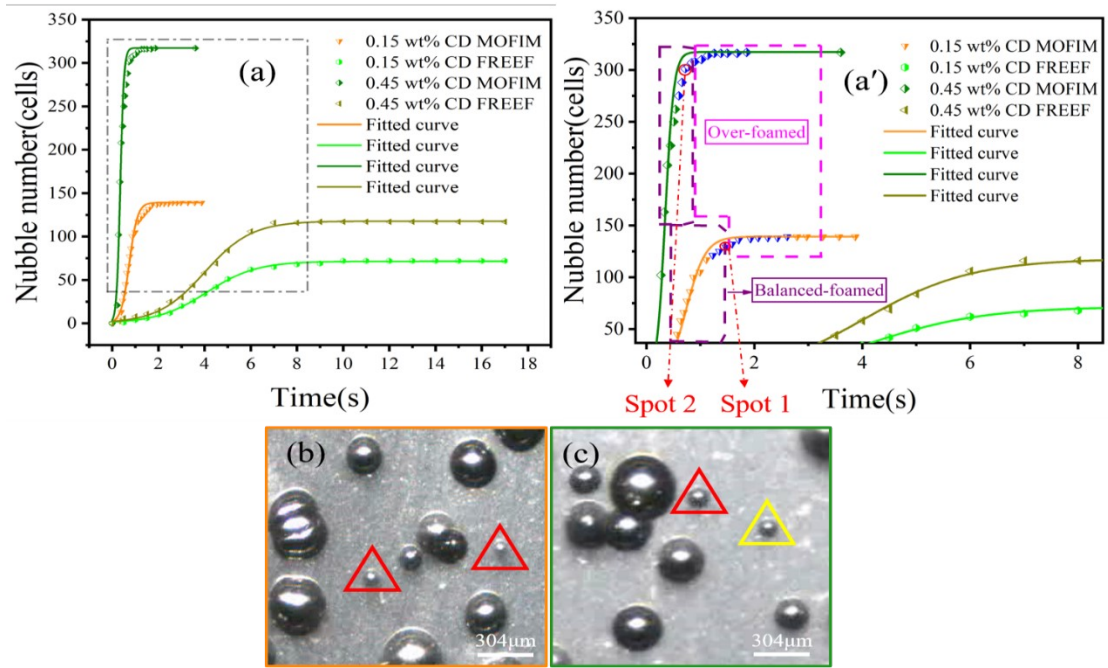

Fig.S3. (a) and (a') are the N-t curves of experimental and fitted values, (b) the visual video screenshots of spot 1, (c) the visual video screenshots of spot 2

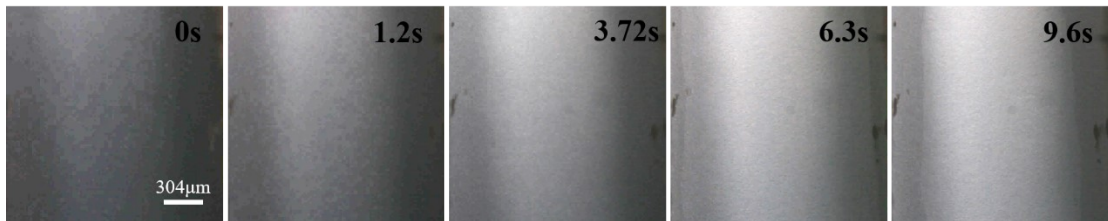

Fig.S4. The screenshot of the visualization video with a mold opening time of 25 s.
